# Supplementary material
Source: PubMed Central journal article supplement (PMC6035298)
Supplement: mmc1.pdf [file mmc1.pdf]

**Biophysical Journal, Volume 115**

**Supplemental Information**

**Membrane Solubilization by Styrene-Maleic Acid Copolymers: Delineating the Role of Polymer Length**

**Juan J. Domínguez Pardo, Martijn C. Koorengevel, Naomi Uwugiaren, Jeroen Weijers, Adrian H. Kopf, Helene Jahn, Cornelis A. van Walree, Mies J. van Steenbergen, and J. Antoinette Killian**

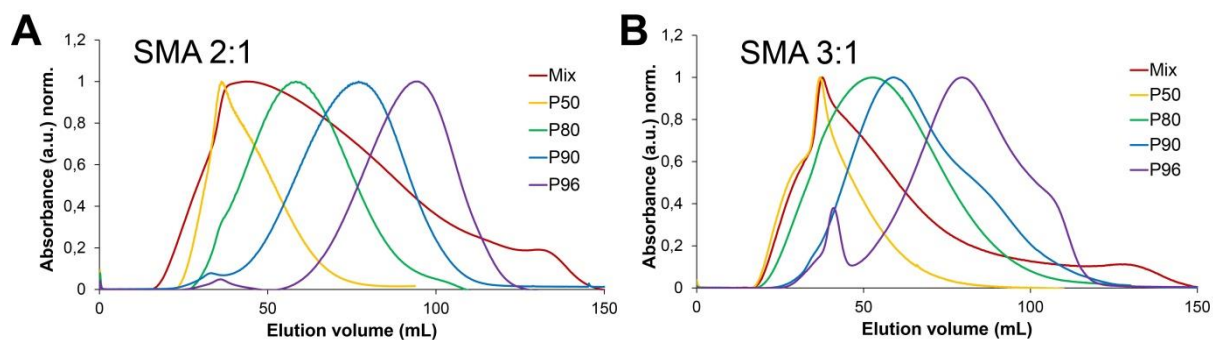

Figure S1. SEC chromatograms of 0.5 % (w/v) SMA copolymers (hydrolyzed form) in 2 mM Britton–Robinson buffer (pH=8.0). For both SMA 2:1 and SMA 3:1 polymers: Non-fractionated: red; P50: orange; P80: green; P90: blue; P96: purple.

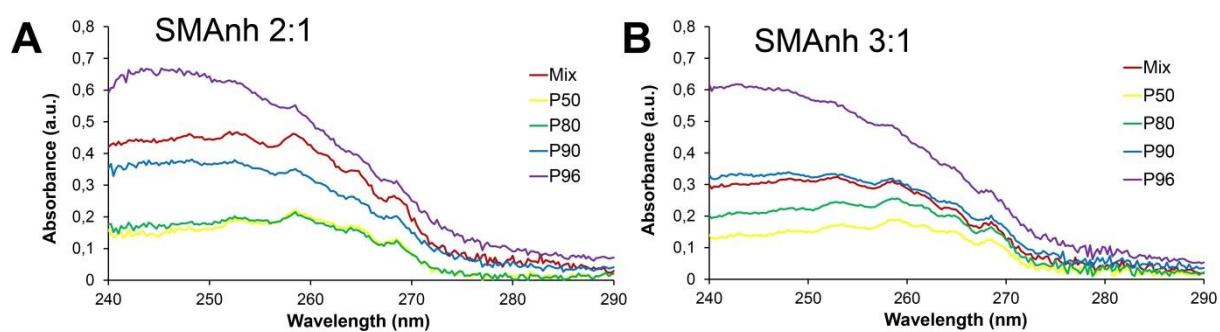

Figure S2. UV-Vis scans of SMAnh copolymers as 0.0125 % (w/v) in THF. Data points were obtained every 0.25 nm at a speed of 120 nm/min. For both SMAnh 2:1 and SMA 3:1nh polymers: Non-fractionated: red; P50: orange; P80: green; P90: blue; P96: purple.

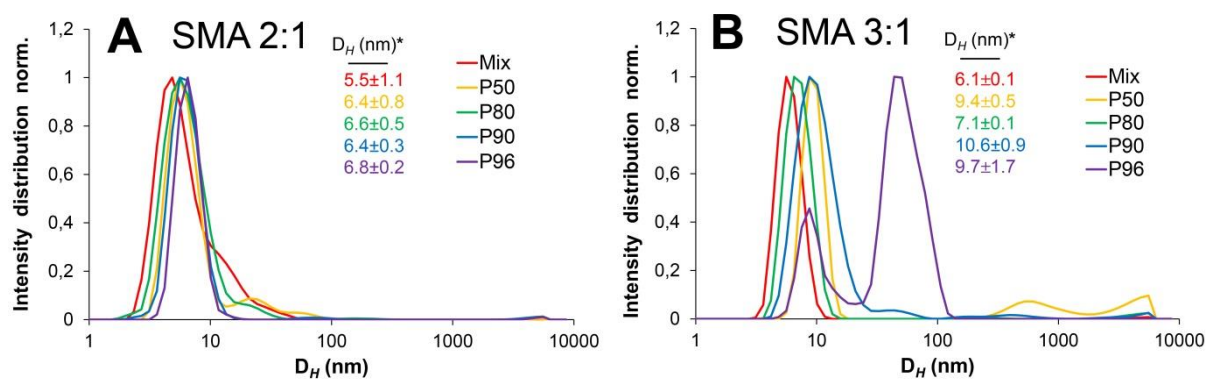

Figure S3. Intensity size distribution of soluble nanodiscs as quantified by dynamic light scattering of di-14:0 PC-nanodiscs bounded by (A) SMA 2:1-derived polymers and (B) SMA 3:1-derived polymers. For both SMA 2:1 and SMA 3:1 polymers: Non-fractionated: red; P50: orange; P80: green; P90: blue; P96: purple. Nanodiscs were obtained at a SMA-to-lipid mass ratio of 3.0. All experiments were performed at T=25 °C.

\*Hydrodynamic diameters and errors reflect the positioning of the peak maximum within 6 x16 consecutive measurements. The actual size distribution is several nm.

\*\*Hydrodynamic diameter corresponding to the first peak at  $D_H \sim 9$  nm.

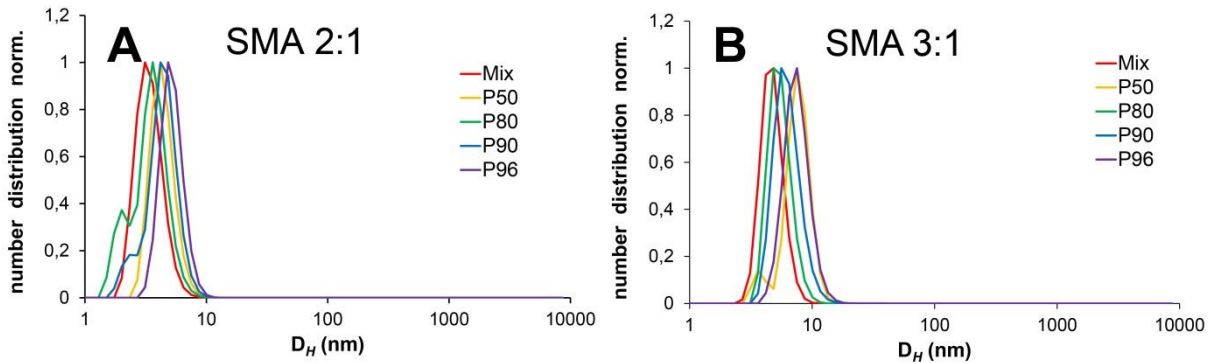

Figure S4. Figure.4. Number size distribution of soluble nanodiscs as quantified by dynamic light scattering of di-14:0 PC-nanodiscs bounded by (A) SMA 2:1-derived polymers and (B) SMA 3:1-derived polymers. For both SMA 2:1 and SMA 3:1 polymers: Non-fractionated: red; P50: orange; P80: green; P90: blue; P96: purple. Nanodiscs were obtained at a SMA-to-lipid mass ratio of 3.0. All experiments were performed at  $T=25$  °C.

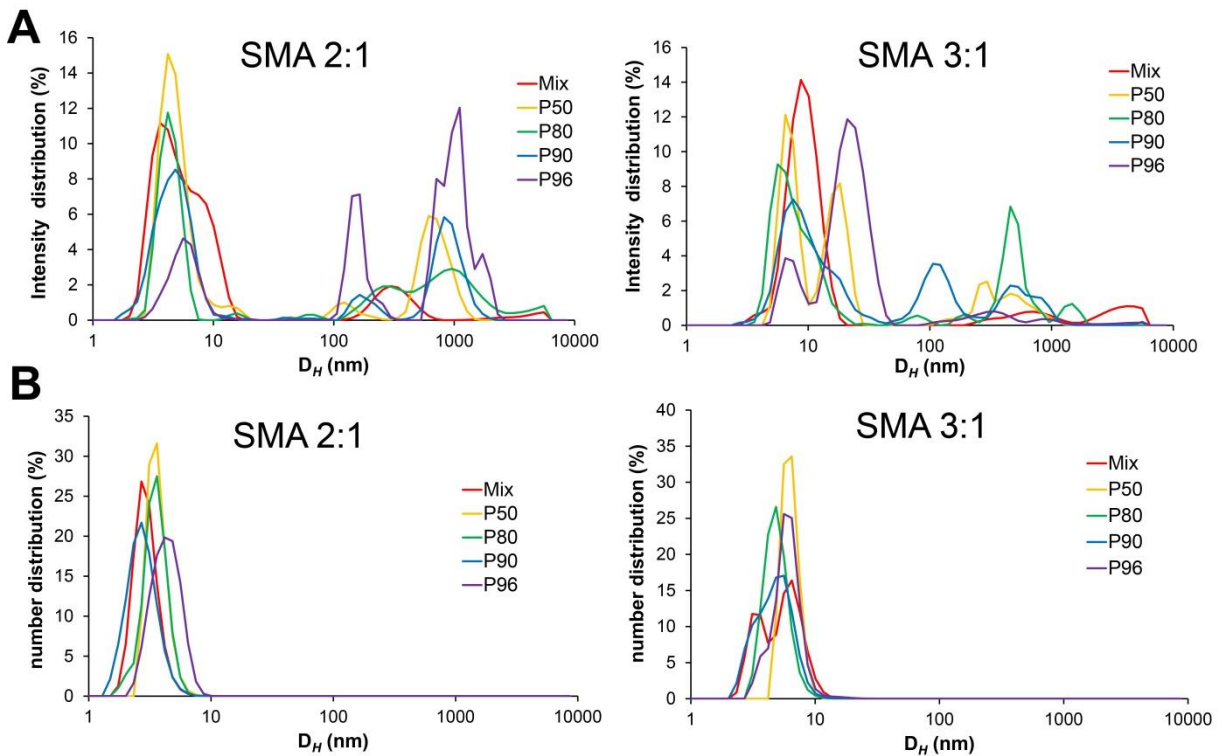

Figure S5. Size distribution of 1 % (w/v) SMA polymers in buffer (Tris 50 mM NaCl 150 mM pH=8.0) expressed as (A) intensity size distribution and (B) number size distribution. For both SMA 2:1 and SMA 3:1 polymers: Non-fractionated: red; P50: orange; P80: green; P90: blue; P96: purple. Nanodiscs were obtained at a SMA-to-lipid mass ratio of 3.0. All experiments were performed at  $T=25$  °C.

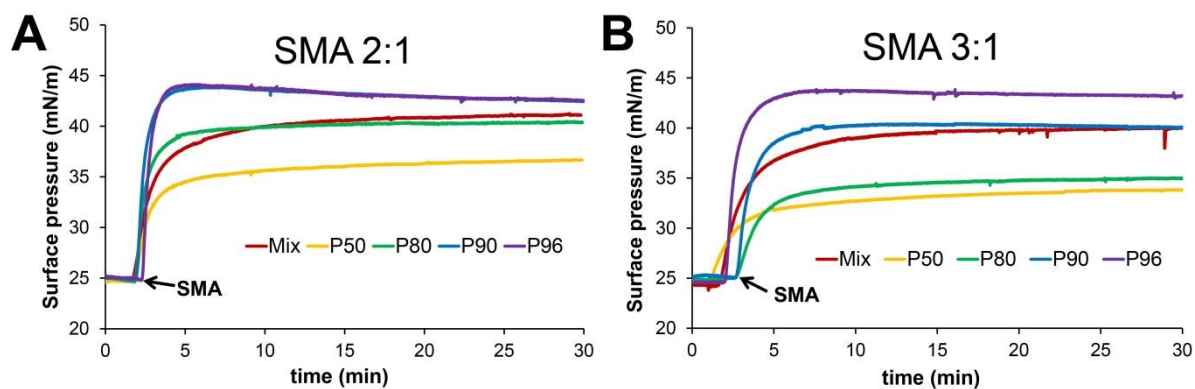

Figure S6. Surface pressure increase in monolayers composed of di-14:0 PC induced by the insertion of SMA copolymer fractions obtained from commercial mixtures consisting of SMA 2:1 (A) or SMA 3:1 (B).

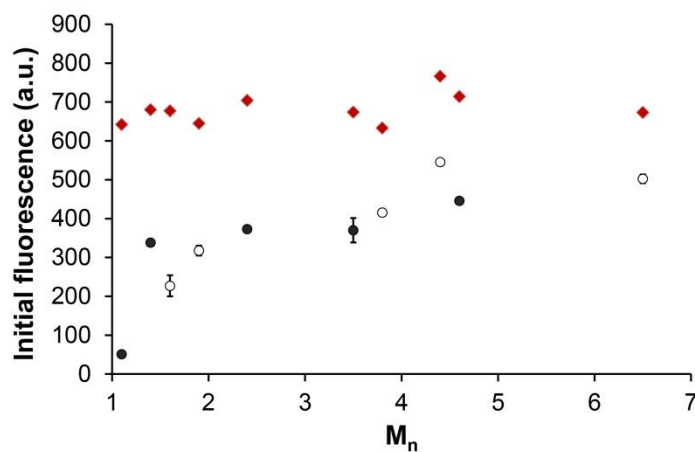

Figure S7. Initial rhodamine fluorescence in nanodiscs bounded to different  $M_n$  SMA mixtures and SMA fractions. Nanodiscs consist of di-14:0 PC with 20 % (mol) N-rhodamine di 14:0 PE s. Nanodiscs encircled by SMA 2:1-derived polymers are indicated by full circles while those by SMA 3:1-derived polymers are indicated by empty circles. Fluorescence was measured after 5 minute stabilization at 30 °C at  $\lambda_{em}=585$  nm. Diamonds indicate the fluorescence intensity values obtained after the addition of empty nanodiscs to a solution of labeled nanodiscs in a 20:1 molar ratio (values corresponding to Figure 6A and 6B). Nanodiscs were obtained at a SMA-to-lipid mass ratio of  $\sim 3$ .

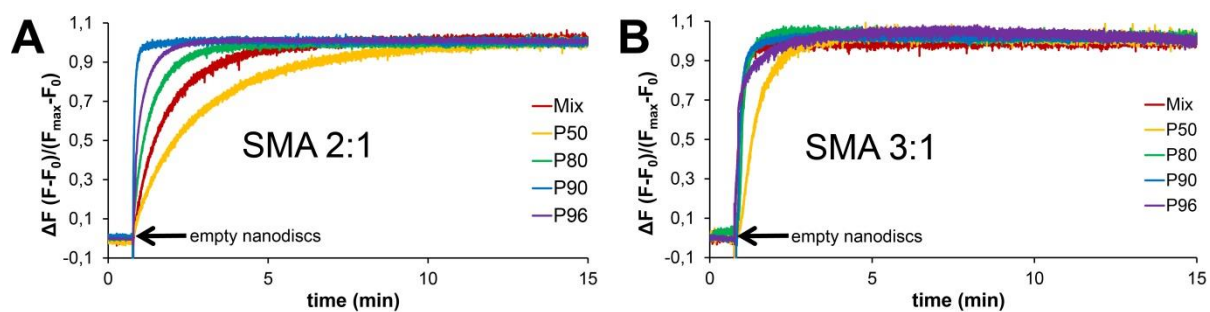

Figure S8. Dequenching of rhodamine-PE incorporated in di-14:0 PC nanodiscs (20% mol rhodamine) with time upon addition of unlabeled nanodiscs. Nanodiscs are bounded by SMA polymers obtained from commercial SMA 2:1 mixtures (A) or from SMA 3:1 mixtures (B). Nanodiscs were obtained at a SMA-to-lipid mass ratio of  $\sim 3$  and mixed in a ratio (mol) of 5:1 empty nanodiscs/ fluorophore-loaded. Fluorescence dequenching was recorded for 15 min at  $\lambda_{em}=585$  nm at 30 °C.

**Table S1.**  $T_m$  values of di-16:0 PC in nanodisc self-assemblies measured by DSC. Data are given as averages of the 2nd and 3rd heating cycle from 2 independent samples, with errors representing the standard deviation.

| $T_m$ (°C) | MLVs     | Mix      | P50      | P80      | P90      | P96      |
|------------|----------|----------|----------|----------|----------|----------|
| SMA 2:1    | 40.8±0.1 | 33.4±0.1 | 32.3±0.2 | 30.7±0.1 | 17.7±0.3 | 33.9±0.8 |
| SMA 3:1    | 40.8±0.1 | 25.4±0.1 | 25.5±0.4 | 24.5±0.1 | 19.0±0.1 | 19.2±0.2 |
